# Supplementary material
Source: PubMed Central journal article supplement (PMC6924272)
Supplement: NIHMS1543758-supplement-1.pdf [file NIHMS1543758-supplement-1.pdf]

| Time (hr) | Selection Strain | BC        | DE    | FG    | HI     | NM   |
|-----------|------------------|-----------|-------|-------|--------|------|
| 0         | BL21             | AASGSYMGG | TRNNY | SAEGG | DRDAPP | WT   |
| 24        | 372              | AASGSYMGG | TRNNY | SAGGG | DRGAPP | NM02 |
| 24        | 372              | AASGSYMGG | TRNNY | SAGGG | DRGAPP | NM02 |
| 24        | 372              | AASGSYMGG | TRNNY | SAGGG | DRGAPP | NM02 |
| 24        | 372              | AASGSYMGG | TRNNY | SAGGG | DRGAPP | NM02 |
| 24        | 372              | AASGSYMGG | TRNNY | SAGGG | DRGAPP | NM02 |
| 24        | 372              | AASGSYMGG | TRNNY | SAEGG | DRGAPP | NM55 |
| 24        | 372              | AASGSYMGG | TRNNY | SAGGG | DRDAPP | NM37 |
| 24        | 369              | AASGSYMGG | TRNNY | SAEGG | DRGAPP | NM55 |
| 24        | 369              | AASGSYMGG | TRNNY | SAEGG | DRGAPP | NM55 |
| 24        | 369              | AASGSYMGG | TRNNY | SAEGG | NRGAPP | NM14 |
| 24        | 369              | AASGSYMGG | TRNNY | SAEGG | NRGAPP | NM14 |
| 24        | 369              | AASGSYMGG | TRNNY | SAEGG | NRGAPP | NM14 |
| 24        | 369              | AASGSYMGG | TRNNY | SAEGG | DRGAPP | NM55 |
| 24        | 369              | AASGSYMGG | TRNNY | SAEGG | DRGAPP | NM55 |
| 24        | 369              | AASGSYMGG | TRNNY | SAEGG | DRGAPP | NM55 |
| 48        | 372              | AASGSYMRG | TRNNY | SAEGG | DRDARP | NM21 |
| 48        | 372              | AASGSYMRG | TRNNY | SAEGG | DRDARP | NM21 |
| 48        | 372              | AASGSYMRG | TRNNY | SAEGG | DRDAH  | NM56 |
| 48        | 372              | AASGSYMRG | TRNNY | SAEGG | DRDAH  | NM56 |
| 48        | 372              | AASGSYMRG | TRNNY | SAEGG | DRDAH  | NM56 |
| 48        | 372              | AASGSYMRG | TRNNY | SAEGG | DRDAH  | NM56 |
| 48        | 372              | AASGSYMGG | TRNNY | SAEGG | DRGAHP | NM50 |
| 48        | 372              | AASGSYMGG | TRNNY | SAEGG | DRGAHP | NM50 |
| 48        | 372              | AASGSYMGG | TRNNY | SAEGG | DRGAHP | NM50 |
| 48        | 372              | AASGSYMGG | TRNNY | SAEGG | DRGAHP | NM50 |
| 48        | 369              | AASGSYMGG | TRNNY | SAGGG | DRDAPP | NM37 |
| 48        | 369              | AASGSYMGG | TRNNY | SAEGG | DRDARP | NM33 |
| 48        | 369              | AASGSYMGG | TRNNY | SAEGG | DRGAPP | NM55 |
| 48        | 369              | AASGSYMGG | TRNNY | SAEGG | DRGAPP | NM55 |
| 48        | 369              | AASGSYMRG | TRNNY | SAEGG | DRDAPP | NM34 |
| 48        | 369              | AASGSYMRG | TRNNY | SAEGG | DRDAPP | NM34 |
| 48        | 369              | AASGSYMRG | TRNNY | SAEGG | DRDAPP | NM34 |
| 48        | 369              | AASGSYMRG | TRNNY | SAEGG | DRDAPP | NM34 |
| 48        | 369              | AASGSYMRG | TRNNY | SAEGG | DRDAPP | NM34 |
| 48        | 369              | AASGSYMRG | TRNNY | SAEGG | DRDARP | NM21 |
| 48        | 369              | AASGSYMRG | TRNNY | SAEGG | DRDAH  | NM56 |

**Table S1: Summary of Sanger sequencing results for the gp17 tip region of natural T3 phage mutants isolated from 24 and 48 hr co-cultures of T3 and BL21. Related to Figure 2.**

A BL21 culture (5 mL; OD = 0.7) was infected with T3 ( $10^7$  PFU) and was co-cultured for 24 and 48 hrs. After which, phage lysates were chloroform treated and filtered. Natural phage mutants were selected for and plaque purified on either isolation hosts: *AwaaC* or *AwaaG*.

| Targeted loop | Theoretical diversity (number of different combinations from NNK codon randomization) | Number of libraries constructed | Cumulative coverage (% of theoretical diversity) | Number of phagebody libraries producing “hits” on <i>ΔwaaC</i> | Number of phagebody libraries producing “hits” on <i>ΔwaaG</i> |
|---------------|---------------------------------------------------------------------------------------|---------------------------------|--------------------------------------------------|----------------------------------------------------------------|----------------------------------------------------------------|
| WT gp17       | NA                                                                                    | 21                              | NA                                               | 0                                                              | 0                                                              |
| BC            | 3.5E+13                                                                               | 10                              | ~0.0000005                                       | 4                                                              | 7                                                              |
| BC[1-4]       | 1.0E+06                                                                               | 10                              | ~60                                              | 4                                                              | 6                                                              |
| BC[3-7]       | 3.4E+07                                                                               | 10                              | ~90                                              | 2                                                              | 5                                                              |
| BC[6-9]       | 1.0E+06                                                                               | 8                               | >100                                             | 2                                                              | 4                                                              |
| DE            | 3.4E+07                                                                               | 10                              | ~50                                              | 2                                                              | 4                                                              |
| FG            | 3.4E+07                                                                               | 10                              | ~0.3                                             | 0                                                              | 0                                                              |
| HI            | 1.0E+06                                                                               | 15                              | >100                                             | 15                                                             | 15                                                             |
| HI[+1]        | 3.4E+10                                                                               | 4                               | ~0.00002                                         | 3                                                              | 4                                                              |
| HI[+3]        | 3.4E+07                                                                               | 14                              | ~20                                              | 10                                                             | 10                                                             |

**Table S2: Cumulative summary of phagebody libraries constructed. Related to Figure 3.**

The theoretical diversity expresses the total number of possible DNA combinations based on the number of NNK codons randomized ( $4 \times 4 \times 2^{\# \text{ of codons mutagenized}}$ ). The cumulative coverage is the sum of the library transformation yields for all the libraries ever constructed for that loop. Calculated cumulative coverage is the percentage of theoretical diversity as determined by the total number of plasmid clones obtained for all repeats for each type of library. “Hits” are defined as obtaining at least one PFU on a lawn of the corresponding selective BL21 mutants, *ΔwaaC* or *ΔwaaG*.

| Mutated sequence  | Targeted loop | Loop DNA sequence                              | Loop protein sequence | Isolation method                     | Part of cocktail |
|-------------------|---------------|------------------------------------------------|-----------------------|--------------------------------------|------------------|
| T3                | BC            | GCTGCTAGTGGTAGTTAC<br>ATGGGAGGAGGT             | AASGSYMGGG            |                                      |                  |
| T3(BC:AASGSHMHT)  | BC            | GCTGCTAGTGGTAGTCAT<br>ATGCATACTGGC             | AASGSHMHTG            | panning on PRM01                     | Yes              |
| T3(BC:AAGKNALGG)  | BC+H          | GCTGCTGGTAAGAATGCC<br>CTGGGAGGAGGT//C163<br>1T | AAGKNALGGG//<br>A544V | direct plaque picking                |                  |
| T3(BC:AARKRGLGG)  | BC            | GCTGCTAGGAAGCGGGGT<br>CTGGGAGGAGGT             | AARKRGLGGG            | panning on PRM01                     | Yes              |
| T3(BC:MHGKSYMGG)  | BC+FG         | ATGCATGGTAAGAGTTAC<br>ATGGGAGGAGGT//G157<br>0A | MHGKSYMGGG//<br>A524T | direct plaque picking                |                  |
| T3(BC:AIGRSHLKS)  | BC            | GCGATTGGTAGGTCTCAT<br>TTGAAGAGTGGT             | AIGRSHLKS             | direct plaque picking                |                  |
| T3(HI:AASGSKLRH)  | BC            | GCTGCTAGTGGTAGTAAG<br>CTGAGGCATGGC             | AASGSKLRHG            | panning on <i>ΔwaaC</i>              | Yes              |
| T3(BC:AASGSHMHK)  | BC            | GCTGCTAGTGGTAGTCAT<br>ATGCATACTGGC             | AASGSHMHKG            | panning on <i>ΔwaaG</i>              | Yes              |
| T3                | FG            | TCAGCCGAGGGCGGT                                | SAEGG                 |                                      |                  |
| T3(FG:PLDGH)      | FG            | CCGTTGGATGGTCAT                                | PLDGH                 | panning on <i>ΔwaaG</i><br>and PRM01 | Yes              |
| T3                | HI            | AGAGATGCGCCTCCA                                | RDAPP                 |                                      |                  |
| T3(HI:GHLSL)      | HI            | AGACATGGGTTGTCTTTG                             | RGHLSL                | panning on <i>ΔwaaG</i>              | Yes              |
| T3(HI:LGLAV)      | HI            | AGACTGGGTCTTGCTGTT                             | RLGLAV                | panning on PRM01                     | Yes              |
| T3(HI:HSVV)       | FG+HI         | G1570A//AGACATTCGG<br>TGTT                     | A524T//RHSVV          | direct plaque picking                |                  |
| T3(HI:NCHV)       | HI            | AGAAATGTTCATGTG                                | RNCHV                 | panning on PRM01                     | Yes              |
| T3(HI:HTGI)       | HI            | AGACATACGGGTATT                                | RHTGI                 | panning on <i>ΔwaaG</i>              | Yes              |
| T3(HI:AYASP)      | HI            | AGAGCTTATGCGTCTCCA                             | RAYASP                | direct plaque picking                |                  |
| T3(HI:KSGV)       | HI            | AGAAAGAGTGGGGTG                                | RKSGV                 | direct plaque picking                |                  |
| T3(HI:R546G KAGI) | H+HI          | GGAAAGGCGGGGATT                                | GKAGI                 | direct plaque picking                |                  |
| T3(HI:HTHP)       | HI            | AGACATACTCATCCT                                | RHTHP                 | panning on <i>ΔwaaG</i>              | Yes              |
| T3(HI:HSQP)       | HI            | AGACATTCACGCGG                                 | RHSQP                 | panning on PRM01                     | Yes              |
| T3(HI:KLNI)       | HI            | AGAAAGCTGAATATT                                | RKLNI                 | direct plaque picking                |                  |
| T3(HI:GARV)       | HI            | AGAGGGGCGAGGGTG                                | RGARV                 | direct plaque picking                |                  |
| T3(HI:ASRV)       | HI            | AGAGCGAGTAGGGTG                                | RASRV                 | direct plaque picking                |                  |
| T3(HI:KAGI)       | HI            | AGAAAGGCGGGGATT                                | RKAGI                 | direct plaque picking                |                  |
| T3(HI:RTFI)       | HI            | AGACGTACTTTTATT                                | RRTFI                 | direct plaque picking                |                  |
| T3(HI:RDIRLSI)    | HI            | AGACGGGATATTAGGCTT<br>AGTATT                   | RRDIRLSI              | direct plaque picking                |                  |
| T3(HI:RFFV)       | HI            | AGACGTTTTTTTGTT                                | RRFFV                 | panning on <i>ΔwaaC</i>              | Yes              |

**Table S3: Summary of the phagebodies characterized. Related to Figure 3.**

Summary of all the phagebodies isolated and characterized during this work showing mutated sequences (indicated by green), isolation method, and if used in the minimal cocktail (**Figure 4C**).

|                                                                                         |           |
|-----------------------------------------------------------------------------------------|-----------|
| <b>pSLM49 Construction</b>                                                              |           |
| gtacGAATTCagctGGATCCAGACCTAGGGGATATATTCCGCTTCCTCGCTCA                                   |           |
| gcatCCCGGGtgcaAAGCTTGACGTCGGAATTGCCAGCTGGGGCGCCCTC                                      |           |
| TAGCGGATCCTGAAGGAACGTGACCCAAACAAACCGTACA                                                |           |
| TCGACCCGGGATCTTATCGACTACCTTGGCACCAATCTGA                                                |           |
| <b>subcloning phagebody tips into pSLM49</b>                                            |           |
| GTACTAAGTGGGGAGGTAAGTGGCTT                                                              |           |
| GTGTGATAGTCCATCCGTGGACTTAAAGTA                                                          |           |
| AAGCCACTTACCTCCCCACTTAGTAC                                                              |           |
| TACTTTAAGTCCACGGATGGACTATCACAC                                                          |           |
| <b>pSLM111alpha construction</b>                                                        |           |
| CCTGTGGGGCCCATGCCCTAGGTCATGAGATTATCAAAAAGGATCTTCACC                                     |           |
| GGTGCAGGGCCCTCGACAATTGTCAGCCAATCGACTGGCGAGCGGCATCGC                                     |           |
| TGCGAAgggcccGGATTCGAATTCGTGATCTTCCGTCACAGGTAGGCGC                                       |           |
| GTGGCAGGGCCCGCGTAAGCTAGCGGCGCGCCATTTAAATGAAGTTCCTATTCC                                  |           |
| <b>waaC deletion</b>                                                                    |           |
| CGGATGCGGGTTTTGATCGTTAAAACATCGTCGATGGGCGGTGTAGGCTGGAGCTGCTTC                            |           |
| ACCATCTGATTCTTCCCATACCCACCAATTAATCCCGGATATGGGAATTAGCCATGGTCC                            |           |
| <b>waaG deletion</b>                                                                    |           |
| CGGTTTGCAGCGCGATTTTATGCGTATTGCTCAGACAGTCGTGTAGGCTGGAGCTGCTTC                            |           |
| CCAGACCACCCGTTATGATATCCGCCGCTTCTCTGGCAGATGGGAATTAGCCATGGTCC                             |           |
| <b>direct transformation loop library construction</b>                                  |           |
| CCTGTGGGAGAGTATCAGTCTGAGAACCMNNMNNMNNMNNMNNMNNMNNMNN<br>MNNAGCCCATACTTGAGTCCAGGCC       | BC FW     |
| GGTTCTCAGACTGATACTCTCCACAGG                                                             | BC RV     |
| GGCAGGGTATTTAAGAACATAGCGGATAGANNKNNKNNKNNKACAGCAATAGCC<br>GTAGAGGACGTG                  | HI FW     |
| TCTATCCGCTATGTTCTTAAATACCCTGCC                                                          | HI RV     |
| AACTGGTCCTGACGGTATCTACTTCCTTNNKNNKNNKNNKNNKTGGCTAAAATTC<br>CAGATACACTCTAATGGC           | FG FW     |
| AAGGAAGTAGATACCGTCAGGACCAGTT                                                            | FG RV     |
| CTTAATCCATATGTTGCGGAATCGC                                                               | DE FW     |
| GCGATTCCGCAACATATGGATTAAGNNKNNKNNKNNKNNKTGGAACCTTCTCCGA<br>ACTGGTCCTGACG                | DE RV     |
| GACAAATGGCCTGGACTCAAGTATGGGCTNNKNNKNNKNNKNNKNNKNNKNNKNN<br>KNNKGGTTCTCAGACTGATACTCTCCAC | BC[10] FW |
| AGCCATACTTGAGTCCAGGCCATTGTC                                                             | BC[10] RV |
| GGGTATTTAAGAACATAGCGGATAGANNKNNKNNKNNKNNKNNKNNKNNKNNKNN<br>TAGCCGTAGAGGACGTG            | HI[+3] FW |
| TCTATCCGCTATGTTCTTAAATACCC                                                              | HI[+3] RV |
